# Supplementary material for: ZnS quantum dots impregnated-mesoporous TiO2 nanospheres for enhanced visible light induced photocatalytic application
Source: Royal Society of Chemistry journal article supplement (doi:10.1039/c7ra03061d), 2017-01-01
Supplement: c7ra03061d1.pdf [file c7ra03061d1.pdf]

### Supplementary Information

## ZnS quantum dots impregnated-mesoporous TiO<sub>2</sub> nanospheres for enhanced visible light induced photocatalytic application

S. Harish<sup>a</sup>, M. Sabarinathan<sup>a</sup>, A. Periyannayaga Kristy<sup>b</sup>, J. Archana<sup>b</sup>, M. Navaneethan<sup>a\*</sup>,  
H. Ikeda<sup>a</sup>, Y. Hayakawa<sup>b\*</sup>

<sup>a</sup>Research Institute of Electronics, Shizuoka University, 3-5-1 Johoku, Naka-ku, Hamamatsu,  
Shizuoka 432-8011, Japan

<sup>b</sup>SRM Research Institute, Department of Physics and Nanotechnology, SRM University,  
Kattankulathur, Chennai, 603203, Tamil Nadu, India.

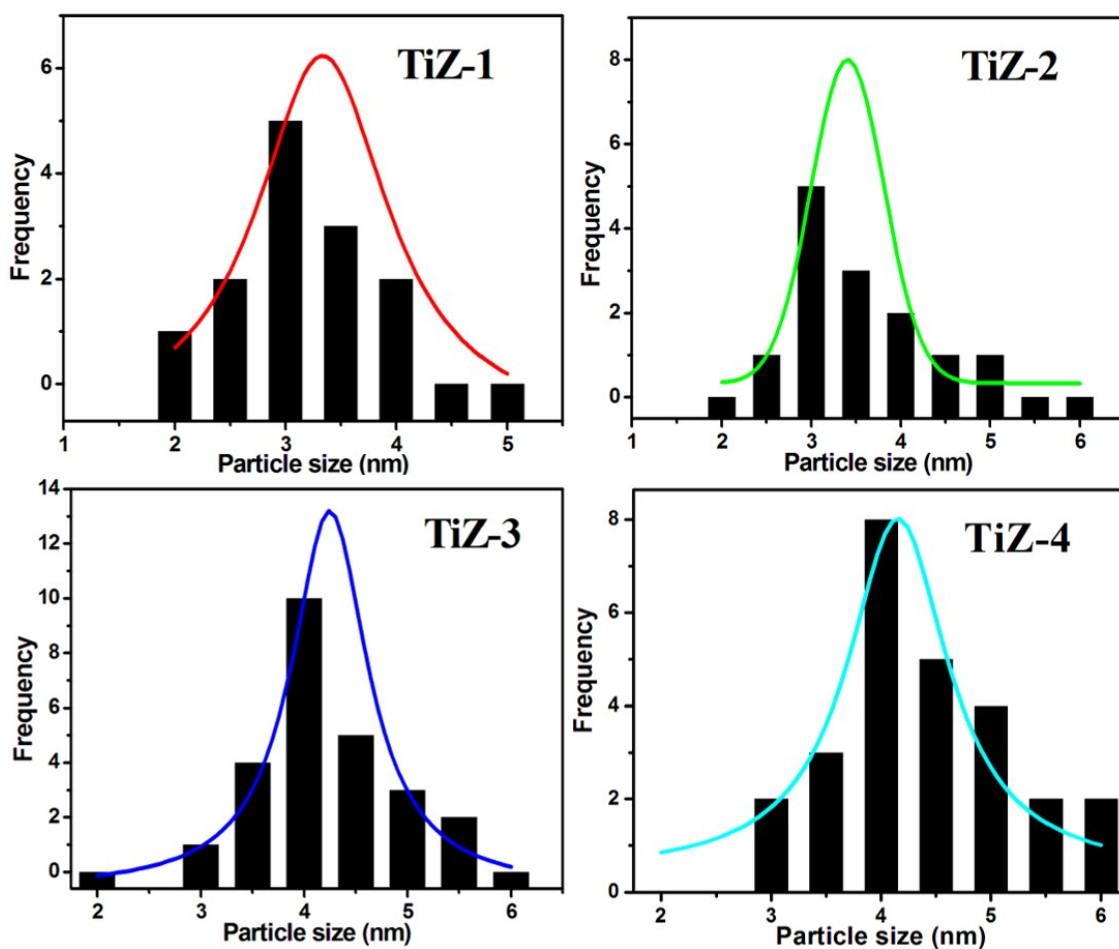

Fig. S1 Histograms of ZnS quantum dots size distribution in samples.

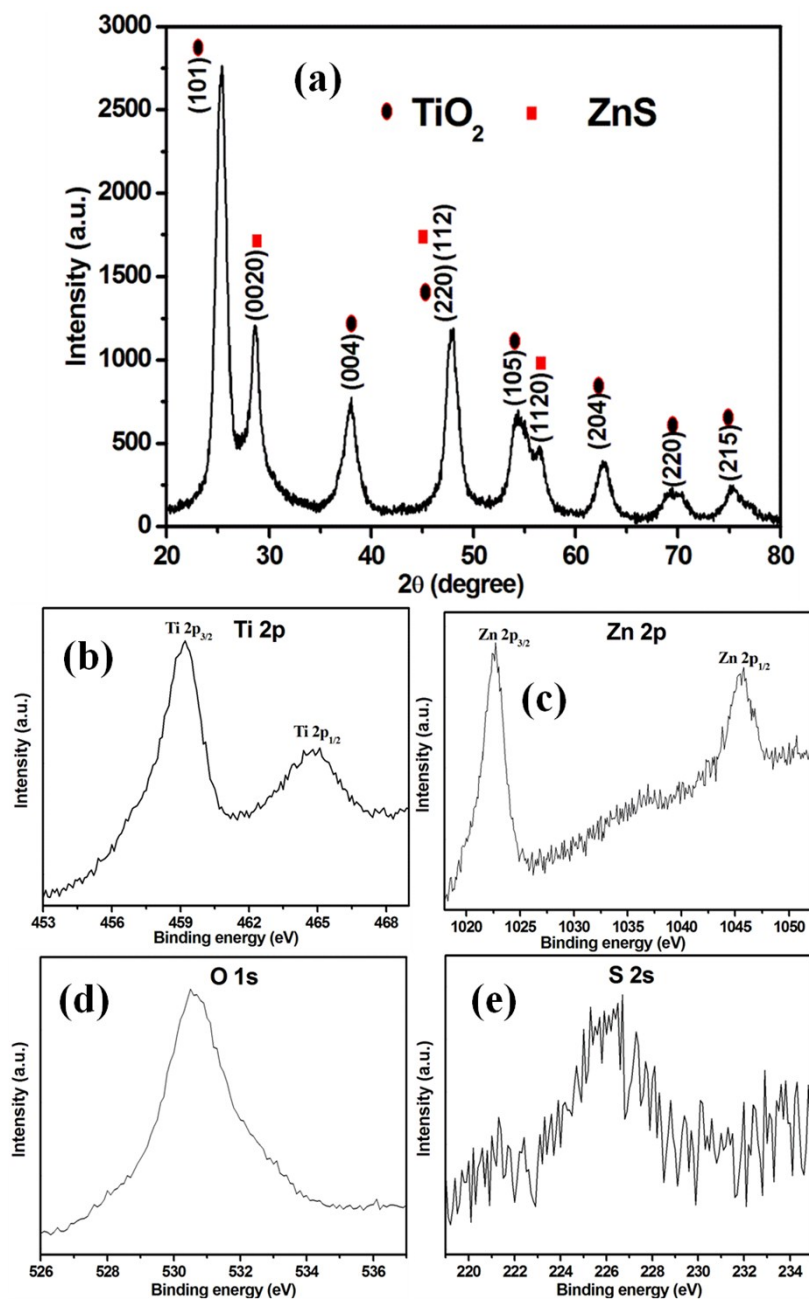

**Fig. S2 XRD (a) and XPS spectra of (b) Ti 2p, (c) Zn 2p, (d) O1s and (d) S 2s states of sample TiZ-1 after photocatalytic reaction.**
